# Supplementary material
Source: publisher figshare collection journal article supplement (https://tandf.figshare.com/articles/dataset/_/12294089)
Supplement: Supplementary file 1 [file 1]

Table S1. Table summary of the total amount of water each spring produces in Kharkiv, Ukraine, the total population each spring is able to support, and if each spring can support the closest population.

| <i>Table Summary of Urban Springs Ability to Support Closest Populations in Kharkiv, Ukraine</i> |                                      |                  |                                  |                                    |                                 |                                                 |
|--------------------------------------------------------------------------------------------------|--------------------------------------|------------------|----------------------------------|------------------------------------|---------------------------------|-------------------------------------------------|
| Spring ID                                                                                        | Total Population within Service Area | Discharge Amount | Supportable Population at 2L24hr | Difference in Population Supported | Percent of Population Supported | Can this Spring Support the Closest Population? |
| 1                                                                                                | 23,321                               | 0.2              | 8,640                            | -14,681                            | 37.0%                           | no                                              |
| 2                                                                                                | 87,034                               | 1.7              | 73,440                           | -13,594                            | 84.4%                           | no                                              |
| 3                                                                                                | 84,131                               | 0.2              | 8,640                            | -75,491                            | 10.3%                           | no                                              |
| 4                                                                                                | 44,407                               | 0.65             | 28,080                           | -16,327                            | 63.2%                           | no                                              |
| 5                                                                                                | 58,047                               | 0.6              | 25,920                           | -32,127                            | 44.7%                           | no                                              |
| 6                                                                                                | 38,602                               | 1                | 43,200                           | 4,598                              | 111.9%                          | yes                                             |
| 7                                                                                                | 45,707                               | 0.42             | 18,144                           | -27,563                            | 39.7%                           | no                                              |
| 8                                                                                                | 21,259                               | 0.003            | 130                              | -21,130                            | 0.6%                            | no                                              |
| 9                                                                                                | 51,538                               | 0.25             | 10,800                           | -40,738                            | 21.0%                           | no                                              |
| 10                                                                                               | 19,358                               | 0.4              | 17,280                           | -2,078                             | 89.3%                           | no                                              |
| 11                                                                                               | 170                                  | 0.023            | 994                              | 823                                | 583.5%                          | yes                                             |
| 12                                                                                               | 9,861                                | 0.25             | 10,800                           | 939                                | 109.5%                          | yes                                             |
| 13                                                                                               | 1,223                                | 0.088            | 3,802                            | 2,579                              | 310.9%                          | yes                                             |
| 14                                                                                               | 185,845                              | 0.03             | 1,296                            | -184,549                           | 0.7%                            | no                                              |
| 15                                                                                               | 47,237                               | 0.35             | 15,120                           | -32,117                            | 32.0%                           | no                                              |
| 16                                                                                               | 35,013                               | 2.8              | 120,960                          | 85,947                             | 345.5%                          | yes                                             |
| 17                                                                                               | 69,221                               | 4                | 172,800                          | 103,579                            | 249.6%                          | yes                                             |
| 18                                                                                               | 101,616                              | 3.5              | 151,200                          | 49,584                             | 148.8%                          | yes                                             |
| 19                                                                                               | 7,136                                | 1.7              | 73,440                           | 66,304                             | 1029.1%                         | yes                                             |
| 20                                                                                               | 47,874                               | 0.3              | 12,960                           | -34,914                            | 27.1%                           | no                                              |
| 21                                                                                               | 49,059                               | 0.2              | 8,640                            | -40,419                            | 17.6%                           | no                                              |
| 22                                                                                               | 81,763                               | 0.33             | 14,256                           | -67,507                            | 17.4%                           | no                                              |
| 23                                                                                               | 171,673                              | 1.5              | 64,800                           | -106,873                           | 37.7%                           | no                                              |
| 24                                                                                               | 116,497                              | 1.25             | 54,000                           | -62,497                            | 46.4%                           | no                                              |
| 25                                                                                               | 45,749                               | 1.5              | 64,800                           | 19,051                             | 141.6%                          | yes                                             |
| 26                                                                                               | 47,454                               | 0.8              | 34,560                           | -12,894                            | 72.8%                           | no                                              |

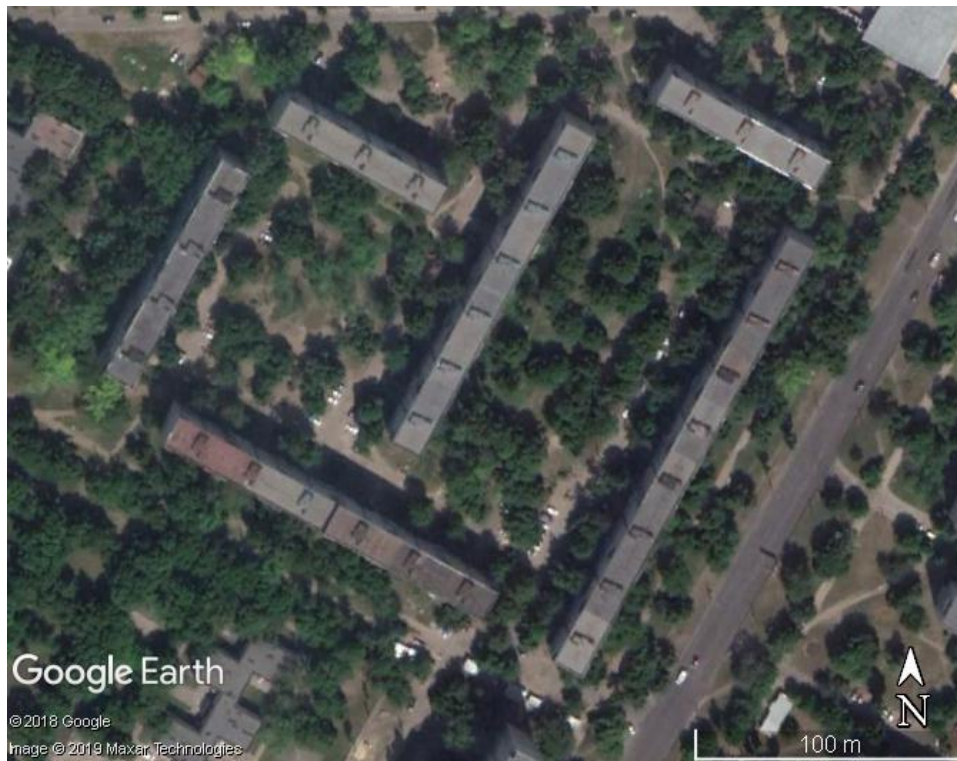

Figure S2. Imagery displaying the homogenous apartment building style in Kharkiv, Ukraine. The number of sections in a building are determined by the number of elevator shafts observable from the imagery.
