# Supplementary material
Source: publisher figshare collection journal article supplement (https://tandf.figshare.com/articles/dataset/_/12294089)
Supplement: Supplementary file 2 [file 1]

## Supplemental Material

Detailed methodology flow chart on number of people within Kharkiv, Ukraine and the ability of the springs to support the closest populations in case of an emergency.

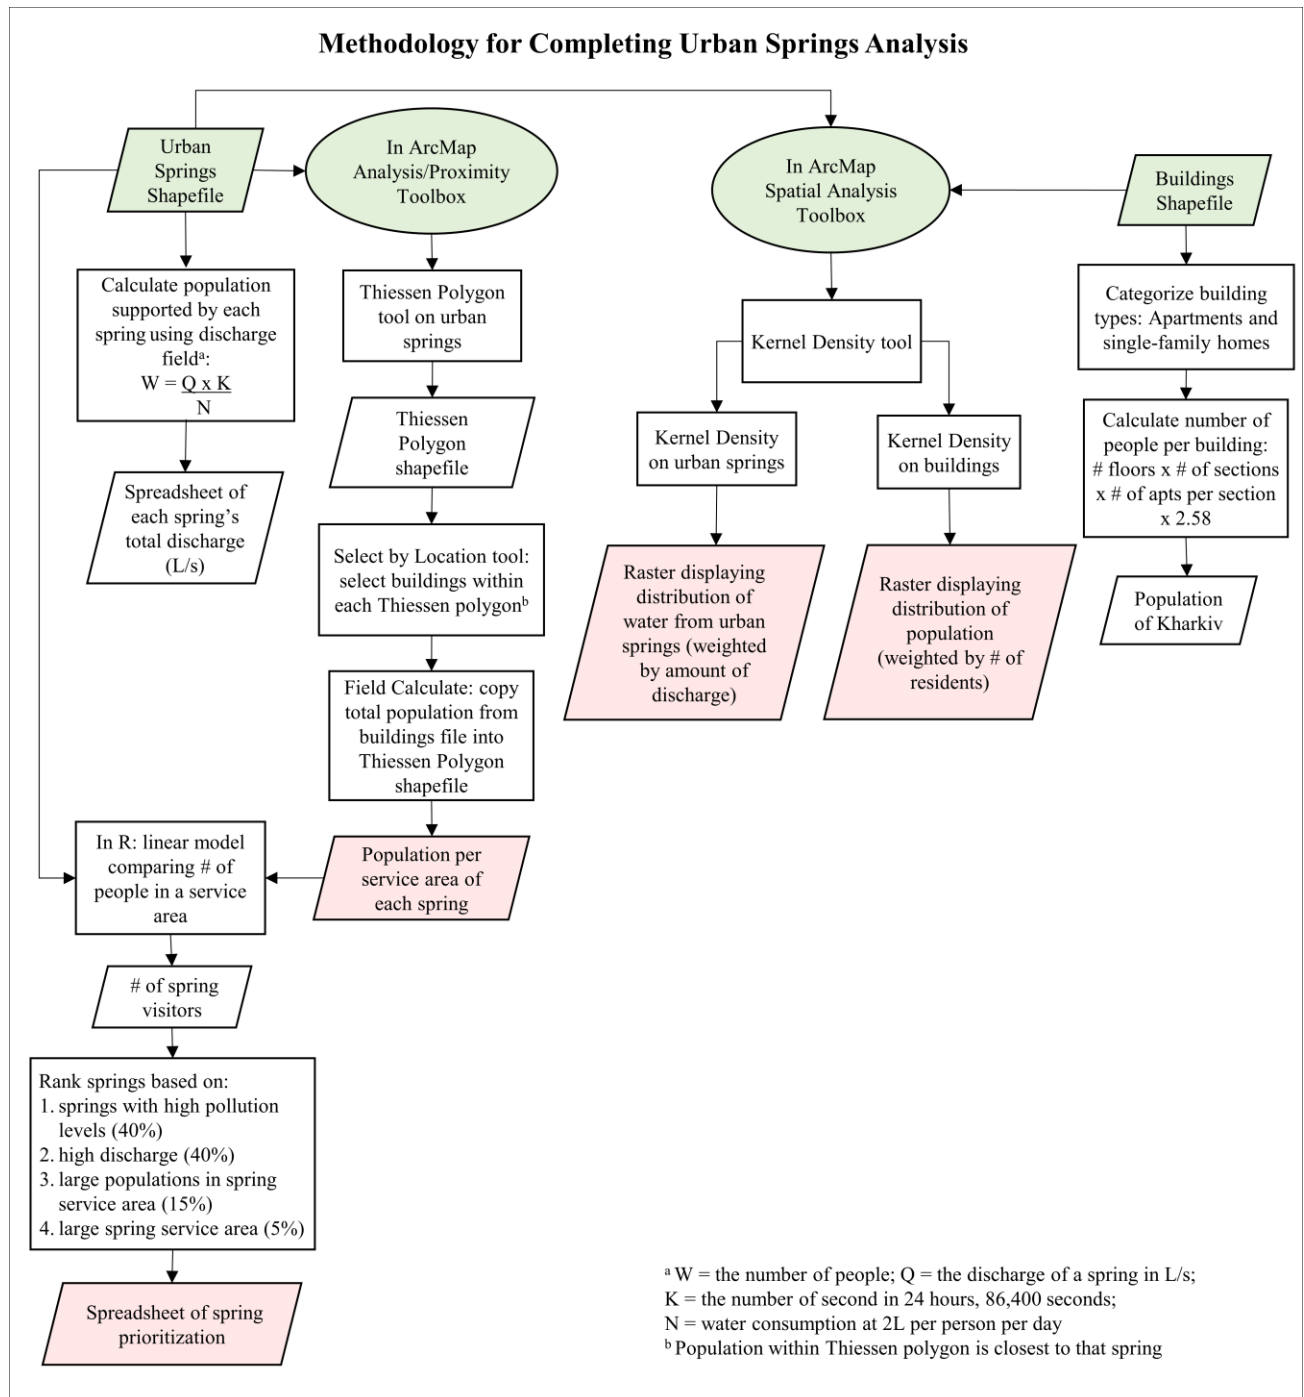

Figure S1. Detailed methodology to compare the number of citizens each urban spring can support given the amount of discharge to the total population closest to each spring in Kharkiv, Ukraine. Establish a pattern of consumption: 2 hours over 24 hours of access. In Esri ArcMap, run the Kernel Density tool using the urban springs shapefile to see area(s) of Kharkiv with clusters of springs that have large discharge amounts. Run the Create Thiessen Polygon tool using the urban springs shapefile. Each Thiessen polygons represents the area closest that spring. In Esri ArcMap, use Select by Location tool to identify total population within each Thiessen polygon. In Microsoft Excel, create a table to compare the total population.
